1 **Title:**

2 **Predictors of cognitive impairment in primary age-related tauopathy: an autopsy study**

3 **Authors:** Megan A. Iida BS<sup>1\*</sup>, Kurt Farrell PhD<sup>1\*</sup>, , Jamie M. Walker MD, PhD<sup>2</sup>, Timothy E. Richardson  
4 DO, PhD<sup>2</sup>, Gabe Marx<sup>1</sup>, Clare H. Bryce MD<sup>1</sup>, Dushyant Purohit MD<sup>1</sup>, Gai Ayalon PhD<sup>4</sup>, Thomas G. Beach  
5 MD-PhD<sup>5</sup>, Eileen H. Bigio MD<sup>6</sup>, Ety Cortes MD<sup>1</sup>, Marla Gearing PhD<sup>7</sup>, Vahram Haroutunian PhD<sup>8</sup>, Corey  
6 T. McMillan PhD<sup>9</sup>, Eddie B. Lee<sup>9</sup>, Dennis Dickson MD<sup>10</sup>, Ann C. McKee MD<sup>11</sup>, Thor D. Stein MD-PhD<sup>11</sup>,  
7 John Q. Trojanowski MD-PhD<sup>12</sup>, Randall L. Woltjer MD<sup>13</sup>, Gabor G. Kovacs MD-PhD<sup>14,15,16</sup>, Julia K. Kofler  
8 MD<sup>17</sup>, Jeffrey Kaye MD<sup>18</sup>, Charles L. White III MD<sup>19</sup>, John F. Crary MD-PhD<sup>1\*\*</sup>

- 9
- 10 1) Department of Pathology, Neuropathology Brain Bank & Research CoRE, Nash Family Department of  
11 Neuroscience, Friedman Brain Institute, Ronald M. Loeb Center for Alzheimer's Disease, Icahn School  
12 of Medicine at Mount Sinai, USA;
- 13
- 14 2) Department of Pathology and Laboratory Medicine and The Glenn Biggs Institute for Alzheimer's &  
15 Neurodegenerative Diseases, UT Health San Antonio, San Antonio, TX, USA;
- 16
- 17 4) Ultragenyx Pharmaceuticals USA;
- 18
- 19 5) Neuropathology, Banner Sun Health Research Institute, Sun City, Arizona, USA;
- 20
- 21 6) Department of Pathology, Northwestern Cognitive Neurology and Alzheimer Disease Center,  
22 Northwestern University Feinberg School of Medicine, Chicago, Illinois, USA;
- 23
- 24 7) Department of Pathology and Laboratory Medicine, Emory University School of Medicine, Atlanta,  
25 Georgia, USA;
- 26
- 27 8) Departments of Psychiatry and Neuroscience; Alzheimer's Disease Research Center, Icahn School of  
28 Medicine at Mount Sinai, New York, New York, USA; and JJ Peters VA Medical Center (MIRECC), Bronx,  
29 NY.
- 30
- 31 9) Department of Neurology, Perelman School of Medicine, Penn FTD Center, Center for  
32 Neurodegenerative Disease Research, University of Pennsylvania, Philadelphia, Pennsylvania, USA;
- 33
- 34 10) Department of Neuroscience, Mayo Clinic, Jacksonville, Florida, USA;
- 35
- 36 11) Department of Pathology, VA Medical Center & Boston University School of Medicine, Boston,  
37 Massachusetts, USA;
- 38
- 39 12) Center for Neurodegenerative Disease Research, Department of Pathology and Laboratory Medicine,  
40 Perelman School of Medicine, University of Pennsylvania, Philadelphia, Pennsylvania, USA;
- 41
- 42 13) Department of Pathology, Oregon Health Sciences University, Portland, Oregon, USA;
- 43
- 44 14) Laboratory Medicine Program & Krembil Brain Institute University Health Network Toronto Ontario  
45 Canada;
- 46

47 15) Tanz Centre for Research in Neurodegenerative Disease and Department of Laboratory Medicine  
48 and Pathobiology, University of Toronto, Toronto, Ontario, Canada;

49  
50 16) Previous address: Institute of Neurology, Medical University of Vienna, Vienna, Austria;

51  
52 17) Department of Pathology, University of Pittsburgh Medical Center, Pittsburgh, Pennsylvania, USA;

53  
54 18) Department of Neurology, Oregon Health & Science University, Portland USA;

55  
56 19) Neuropathology Laboratory, Department of Pathology, University of Texas Southwestern Medical  
57 Center, USA;

58  
59 \* These authors contributed equally to this work

60 \*\* Correspondence:

61

62 John F. Crary, MD-PhD

63 Professor, Department of Pathology

64 Director, Neuropathology Brain Bank & Research CoRE

65 Nash Family Department of Neuroscience

66 Friedman Brain Institute

67 Ronald M. Loeb Center for Alzheimer's Disease

68 Icahn School of Medicine at Mount Sinai

69 1 Gustave L. Levy Place Box 1194 New York, NY 10029, USA

70 Telephone: (212) 659-8695, Email: [john.crary@mountsinai.org](mailto:john.crary@mountsinai.org)

71 The authors declare no conflicts of interest

72

73

## 74 **Acknowledgements**

75

76 This work was supported by the National Institutes of Health [R01 AG054008, R01 NS095252, R01

77 AG060961, and R01 NS086736 to J.F.C, F32 AG056098 and P30 AG066514 to K.F., R01 AG062348 to

78 J.F.C., A.M., and D.D., P30 AG010124, P01 AG017586 and U19 AG062418 to J.Q.T, R01 AG066152 to

79 C.T.M, P50 AG005133 to J.K., P50 AG005138, P30 AG066514, and 75N95019C00049 to V.H., U24

80 NS072026 and P30 AG019610 to T.B., P30 AG013854 to E.B., P30 NS055077 and P50 AG025688 to  
81 M.G., P30 AG08017 to R.W. and U54 NS115266 to A.M.], the Alzheimer's Association [NIRG-15-363188  
82 to J.F.C.], the Tau Consortium, Genentech/Roche, David & Elsie Werber, Alexander Saint-Amand  
83 Fellowship, J.M.R. Barker Foundation, The McCune Foundation, and the Winspear Family Center for  
84 Research on the Neuropathology of Alzheimer Disease, The Arizona Department of Health Services, and  
85 the Michael J. Fox Foundation for Parkinson's Research. G.G.K. is supported by the Rossy Foundation  
86 and by the Safra Foundation. The authors would also like to acknowledge Ping Shang, HT(ASCP) QIHC  
87 and Jeff Harris, HTL(ASCP) for histologic and immunohistochemical preparations, and Chan Foong,  
88 M.S., for preparation of whole slide image.

89

90 **Abstract**

91 Primary age-related tauopathy (PART) is a form of Alzheimer-type neurofibrillary degeneration occurring  
92 in the absence of amyloid-beta ( $A\beta$ ) plaques. While PART shares some features with Alzheimer disease  
93 (AD), such as progressive accumulation of neurofibrillary tangle pathology in the medial temporal lobe  
94 and other brain regions, it does not progress extensively to neocortical regions. Given this restricted  
95 pathoanatomical pattern and variable symptomatology, there is a need to reexamine and improve upon  
96 how PART is neuropathologically assessed and staged. We performed a retrospective autopsy study in  
97 a collection ( $n=174$ ) of post-mortem PART brains and used logistic regression to determine the extent to  
98 which a set of clinical and neuropathological features predict cognitive impairment. We compared Braak  
99 staging, which focuses on hierarchical neuroanatomical progression of AD tau and  $A\beta$  pathology, with  
100 quantitative assessments of neurofibrillary burden using computer-derived positive pixel counts on  
101 digitized whole slide images of sections stained immunohistochemically with antibodies targeting  
102 abnormal hyperphosphorylated tau ( $p$ -tau) in the entorhinal region and hippocampus. We also assessed  
103 other factors affecting cognition, including aging-related tau astrogliopathy (ARTAG) and atrophy. We  
104 found no association between Braak stage and cognitive impairment when controlling for age ( $p=0.76$ ).  
105 In contrast,  $p$ -tau burden was significantly correlated with cognitive impairment even when adjusting for  
106 age ( $p=0.03$ ). The strongest correlate of cognitive impairment was cerebrovascular disease, a well-known  
107 risk factor ( $p<0.0001$ ), but other features including ARTAG ( $p=0.03$ ) and hippocampal atrophy ( $p=0.04$ )  
108 were also associated. In contrast, sex, *APOE*, psychiatric illness, education, argyrophilic grains, and  
109 incidental Lewy bodies were not. These findings support the hypothesis that comorbid pathologies  
110 contribute to cognitive impairment in subjects with PART. Quantitative approaches beyond Braak staging  
111 are critical for advancing our understanding of the extent to which age-related tauopathy changes impact  
112 cognitive function.

113 **Keywords:** PART, dementia, Aging, Braak, ARTAG

## 114 Introduction

115 It is widely recognized that abnormal hyperphosphorylated tau (p-tau) deposition is a ubiquitous feature  
116 of the aging human brain, observed in both cognitively normal subjects and in those with a range of  
117 clinical features, including cognitive, motor and psychiatric symptoms [37]. The causes of tauopathy are  
118 diverse, and include both genetic and environmental risk factors [48]. Autosomal dominant mutations in  
119 the tau gene (*MAPT*) cause frontotemporal lobar degeneration and common risk alleles, notably the  
120 *MAPT* 17q21.31 H1 haplotype, are associated with sporadic tauopathies including progressive  
121 supranuclear palsy (PSP), corticobasal degeneration (CBD), and argyrophilic grain disease (AGD) [12].  
122 Abnormal p-tau deposition is also seen following exposure to repetitive head trauma in contact sports  
123 and other contexts in the setting of chronic traumatic encephalopathy (CTE) [43]. Neurofibrillary tangles  
124 (NFT) are also a component of Alzheimer disease (AD), where they are associated amyloid-beta deposits  
125 [16].

126 Although it is generally understood that autopsy studies are critical for establishing definitive  
127 diagnoses, the neuropathology of the tauopathies is complex and overlapping. Further, non-impaired  
128 individuals often display significant amounts of p-tau accumulation, complicating our understanding of  
129 the contribution of such brain changes to symptomatology. Approaches to assessing tauopathy in post-  
130 mortem tissues continue to evolve. Neuropathologically, tauopathies can be differentiated by the  
131 neuroanatomical regionality of p-tau aggregates, cell type involvement (i.e., neurons versus glia),  
132 preferential isoform accumulation, and filament ultrastructure. Based upon these differentiating features,  
133 validated neuropathological diagnostic consensus criteria have been devised and, in some cases,  
134 undergone revision. Examples include revision of the AD diagnostic criteria, and consensus criteria for  
135 CTE [41, 46]. The term aging-related tau astrogliopathy (ARTAG), which was described in recent  
136 consensus criteria on various patterns of astrocytic p-tau observed in aging, has been especially helpful  
137 for differentiating age-related changes from CTE, both of which have perivascular p-tau deposits, but with  
138 differences in cell types involved [38, 42]. The introduction of criteria for primary age-related tauopathy

139 (PART) to describe individuals who develop AD-type neurofibrillary pathology with or without dementia  
140 in the absence of significant amyloid deposition helped to better define this entity and differentiated it  
141 from AD [17]. Understanding age-related tauopathy is of critical importance in the context of diagnosis  
142 and staging of all the tauopathies given its extremely high prevalence and importance as a co-morbidity  
143 in essentially all studies evaluating tauopathy.

144         There has been controversy surrounding the PART consensus criteria since their introduction [11,  
145 19], and there have been a substantial number of recent clinicopathological studies focused on  
146 understanding this pathological presentation [4, 6, 7, 29, 33, 36, 51, 52, 60]. Given the close clinical and  
147 neuropathological similarities between PART and AD such that historically the two entities were classified  
148 together, accumulating evidence has highlighted differences. Clinically, the average age is higher for  
149 individuals who have PART than those with AD and patients with PART are more often female [35].  
150 Patients with PART pathology are more often cognitively normal, but a subset have mild cognitive  
151 impairment or amnesic dementia, and this correlates with p-tau severity [17]. Among symptomatic  
152 individuals with a neuropathological diagnosis of PART, nearly half had been clinically diagnosed with  
153 AD compared with 86% of those with autopsy-confirmed AD, indicating that despite diagnostic  
154 uncertainty, clinicians recognize differences between the two [59]. One retrospective study identified  
155 other factors including depression, Braak stage, and history of stroke, as independent predictors of  
156 cognitive impairment [6]. Another found that those with PART had a sparing of semantic memory  
157 compared to those with AD, suggesting that there is a distinct difference in clinical presentation [8].  
158 Longitudinal analyses found that subjects with PART have a significantly slower clinical decline after  
159 becoming symptomatic than those with AD across multiple neuropsychological domains [60].

160         One limitation of most published studies on PART is that they rely on retrospective analysis of  
161 previously collected datasets (e.g., the National Alzheimer's Coordinating Center database, NACC) with  
162 predefined neuropathological measures that may not fully capture all the clinically relevant features [45].  
163 Further, findings might not be generalizable to other populations, and a lack of uniform analysis and

164 quantitation might lead to bias. Critically, the Braak staging system was specifically developed for  
165 assessment of tau pathology in the context of AD, and has not been rigorously tested in amyloid-negative  
166 subjects, so the extent to which it is valid for staging p-tau pathology in PART is unclear. Additionally, the  
167 Braak stage represents a hierarchical progression of the regional spread of neurofibrillary tangles, but  
168 does not directly measure the severity or burden of p-tau, but this has been incorporated into some  
169 operationalized frameworks [2]. Because the pathology in PART generally remains predominantly in the  
170 medial temporal lobe, this hierarchical pathoanatomical system may sub-optimally measure severity of  
171 the disease. There are numerous approaches to assessing lesion burden of p-tau and other pathologies  
172 [10, 28, 30, 31, 40, 41, 44, 63], including cell counting and stereology [3, 5, 13, 21, 27, 64]. While each  
173 of these approaches have intrinsic advantages, they are limited in that they are labor intensive and for  
174 this reason and others, these methods have not been widely adopted in neuropathology laboratories [20,  
175 62]. One approach that may have potential to better assess p-tau in PART is using computer-assisted  
176 quantitative morphometrics on digital whole slide images, which may be well suited for staging PART.

177         Here, we studied a cohort of autopsy-confirmed subjects with PART, enabling us to reexamine  
178 how tau pathology manifests in PART. We compared Braak staging with computer-assisted quantitative  
179 measures of p-tau burden, and used logistic regression to assess their contribution to cognitive  
180 impairment. Using this cohort, we were able to explore critical co-morbid pathologies (e.g.,  
181 cerebrovascular disease), and further assess neuropathological changes that are not available in existing  
182 publicly available datasets, including atrophy and ARTAG.

183 **Methods**

184

185 Patient samples

186

187 Formalin-fixed paraffin embedded (FFPE) tissue from the frontal cortex and hippocampus as well as  
188 fresh-frozen tissue from frontal cortex were derived from autopsy brains from a subset of individuals from  
189 a previously described collection [61]. Specifically, the cohort included cases from the Oregon Health  
190 Sciences University (Portland, OR, USA), Banner Sun Health Research Institute (Sun City, AZ, USA),  
191 Emory (Atlanta, GA, USA), Northwestern (Evanston, IL, USA), the University of Pennsylvania  
192 (Philadelphia, PA, USA), University of Pittsburgh (Pittsburgh, PA, USA), University of Texas  
193 Southwestern Medical Center (Dallas, TX, USA), and the Medical University of Vienna (Vienna, Austria).  
194 Clinical inclusion criteria included being cognitively normal or having a diagnosis of mild cognitive  
195 impairment (MCI) or dementia with a recorded clinical dementia rating (CDR), Mini-Mental State  
196 Examination (MMSE), or postmortem clinical chart review CDR score within two years of death [22, 47].  
197 CDR and MMSE scores were used to assign subjects into either cognitively normal or cognitively  
198 impaired groups. Individuals who had a CDR score of 0.5 or above or MMSE score below 26 were  
199 considered to be cognitively impaired while subjects with a CDR score of 0 or MMSE score 26 or above  
200 were considered cognitively normal [39]. If an individual had both MMSE score and CDR score, the most  
201 recent score was used, and if both scores were given on the same date, the CDR score was used.

202 Comprehensive neuropathological assessments were performed at the contributing institutions.  
203 Neuropathological criteria for PART included (1) cases that had a Braak stage of 0-IV and (2) Consortium  
204 to Establish a Registry for Alzheimer's Disease (CERAD) neuritic plaque severity score of 0 [10, 44].  
205 Neuropathological exclusion criteria consisted of other neurodegenerative diseases including AD, Lewy  
206 body disease, progressive supranuclear palsy (PSP), corticobasal degeneration (CBD), chronic traumatic  
207 encephalopathy (CTE), Pick disease, Guam amyotrophic lateral-sclerosis-parkinsonism-dementia,  
208 subacute sclerosing panencephalitis, globular glial tauopathy. Data pertaining to Braak stage, CERAD,



209 Lewy body pathology (incidental), cerebrovascular disease, infarcts (vascular brain injury), microinfarcts,  
210 and argyrophilic grains, were derived from neuropathologic studies performed at respective centers. The  
211 presence of aging-related tau astrogliopathy (ARTAG) was determined on p-tau immunohistochemical  
212 stains described below [38].

213

#### 214 Atrophy score

215

216 Given that no widely accepted validated system for assessing hippocampal atrophy on human brain  
217 sections exists, we devised a semiquantitative scoring system and applied it to low power images of  
218 hematoxylin & eosin-stained sections counterstained with Luxol fast blue. We defined atrophy severity  
219 as the magnitude of ventricular dilatation (hydrocephalus ex vacuo) relative to the size of the hippocampal  
220 formation. If there was no apparent ventricular dilatation or atrophy, then a score of 0 was assigned. If  
221 there was appreciable atrophy, but the dorsoventral height of the ventricle was less than the height of the  
222 thickest section of CA1, then a score of 1 (mild) was assigned. If the magnitude of ventricular dilatation  
223 exceeded the thickness of CA1, then a score of 2 (moderate) was given. If the total area of the ventricle  
224 area was greater than the area of the hippocampus proper, a score of 3 (severe) was assigned. This  
225 score was derived only in the subset of cases where the entire temporal horn of the lateral ventricle was  
226 available included in the provided section ( $n=24$ ).

227

#### 228 Immunohistochemistry

229

230 Immunohistochemistry (IHC) and hematoxylin & eosin (H&E) stains were performed on FFPE sections  
231 (5  $\mu$ m) that were prepared from blocks of hippocampus and frontal cortex for supplemental  
232 neuropathological analyses (see below). Sections mounted on positively charged slides were dried  
233 overnight at room temperature. IHC was performed on a Leica Bond III automated stainer, according to  
234 the manufacturer's protocols (Leica Microsystems, Buffalo Grove, IL, USA). IHC was performed using

235 antibodies to hyper-phosphorylated tau (p-tau, AT8, 1:1000, Fisher Scientific, Waltham, MA) and beta-  
236 amyloid (A $\beta$ , 6E10, 1:1000, Covance, Princeton, NJ, USA). A $\beta$  stains were confirmed to be negative to  
237 ensure that there were no neuritic or diffuse plaques present (CERAD score of 0) for all cases. For each  
238 set of slides stained, a known severe AD case was included as a batch control.

239

#### 240 Computer-assisted morphometric analysis

241

242 Whole slide images (WSI) were prepared from glass slides that were scanned using an Aperio CS2 (Leica  
243 Biosystems, Wetzlar Germany) digital slide scanner. Quantitative analysis of the tau burden was  
244 performed in selected regions in the hippocampi using the following methodology; WSI were  
245 neuroanatomically segmented using Aperio ImageScope software into the hippocampus proper (i.e.,  
246 dentate, cornu ammonis, and subiculum) and the adjacent cortex that we termed the entorhinal region,  
247 which variably includes posterior portions of the parahippocampal gyrus with remnants of the (trans-  
248 )entorhinal region or lingual gyrus. Staining was measured in these areas separately and together using  
249 a modified version of the Aperio positive pixel count (Version 9) based on the intensities of the positive  
250 control sample in each batch to determine the area of immunoreactivity. Data were normalized using the  
251 number of positive pixel counts to the total area creating a 0-1 p-tau burden scale.

252

#### 253 Genetic analysis

254

255 High-throughput isolation of DNA was performed using the MagMAX DNA Multi-Sample Ultra 2.0 Kit on  
256 KingFisher Flex robotic DNA isolation system (ThermoFisher, Waltham, MA). 20-40 mg of fresh frozen  
257 brain tissue were placed into a deep-well plate and treated with 480  $\mu$ l of Proteinase K mix (Proteinase  
258 K, Phosphate Buffered Saline [pH 7.4], Binding Enhancer) and incubated overnight at 65°C at 800 rpm  
259 on a shaking plate. Genomic DNA was isolated and purified using magnetic particles. DNA quality control  
260 was performed using a nanodrop spectrophotometer (concentration > 50ng/ $\mu$ l, 260/280 ratio 1.7-2.2).

261 Genotyping was performed using single nucleotide polymorphism (SNP) microarrays (Infinium Global  
262 Screening Array v2.4. or the Infinium OmniExpress-24, Illumina, San Diego CA). Raw genotype files were  
263 converted to PLINK-compatible files using GenomeStudio software (Illumina, San Diego CA). *MAPT*  
264 haplotype was determined using the rs8070723 H2 tagging SNP. *APOE* genotype was provided by the  
265 collaborating center. For analyses, the *APOE* status was collapsed into a binary variable of the presence  
266 or absence of *APOE*  $\epsilon 4$ .

267

268 Statistical analysis

269

270 All statistical tests were performed using the statistical software Statistical Package for the Social  
271 Sciences (SPSS) (IBM, Chicago, IL). Data was visualized using the ggplot2 package in project R or Excel  
272 (Microsoft, Redmond, Washington). Binary measurements (yes/no) were created for pathological,  
273 clinical, demographic, and genetic variables. Specifically, variables were extracted from the pathological  
274 diagnosis and binary measurements (yes/no) were created for the following variables: argyrophilic grains,  
275 Lewy body pathology (incidental), cerebrovascular disease, and infarcts (vascular brain injury).  
276 Additionally, the same process was done for clinical variables: history of psychiatric illness and education  
277 (for this study, defined as at least some college).

278 Descriptive statistics were used to identify differences between the cognitively normal and  
279 cognitively impaired PART groups for clinical, pathological, and genetic variables. Differences were  
280 detected using  $\chi^2$  tests or exact  $\chi^2$  if any cell size included  $< 5$  participants. A t-test was performed to  
281 determine if age differed significantly between normal and cognitively groups. Next, an unadjusted binary  
282 logistic regression was performed to determine what genetic, clinical, and pathological variables were  
283 associated with being cognitively impaired within our PART cohort. Lastly, a multivariable model was  
284 created to determine what extent Braak NFT stage and the computer-assisted morphometrics were able  
285 to predict cognitive impairment in PART when adjusting for age. Statistical significance was determined  
286 if  $\alpha < 0.05$ . Not all data was available on the subjects.

287 **Results**

288

289 One hundred seventy-four neuropathologically confirmed amyloid-negative subjects were included in this  
290 study (Table 1, Figure 1). The overall mean age was 83.2 with a range of 52.9-105.1 years. Of these,  
291 124 subjects (mean age 81.0, range = 52.9-102.4) had no cognitive impairment and 50 (mean age 88.3,  
292 range = 69.8-105.1) had some degree of cognitive impairment, with either mild cognitive impairment  
293 (MCI) or dementia. The majority of subjects who were cognitively impaired were 80+ years of age (Figure  
294 2). The Braak NFT stage ranged from 0 to IV with the majority of cognitively impaired subjects having a  
295 Braak NFT score of II to IV. A higher percentage of females had cognitive impairment (62.0%) compared  
296 to those who were cognitively normal (49.2%).

297 We observed several differences among subjects with cognitive impairment compared to those  
298 who were cognitively normal. First, cognitively impaired PART subjects were more likely to be older (age  
299 of testing 81.0 vs. 88.3,  $p < 0.0001$ ), have cerebrovascular disease (42.0% vs. 4.8%,  $p < 0.0001$ ) and  
300 have hippocampal age-related tau astroglipathy (ARTAG; 38.3% vs. 21.6%,  $p < 0.05$ ) compared to  
301 cognitively normal subjects (Table 1). However, education, history of psychiatric illness, argyrophilic  
302 grains, incidental Lewy body pathology, infarcts, presence of an *APOE*  $\epsilon 2$  allele, presence of *APOE*  $\epsilon 4$   
303 allele, and *MAPT* haplotype status did not significantly affect cognitive status ( $p > 0.05$  for all conditions).

304 In our main unadjusted analysis, we assessed the extent to which a series of clinical,  
305 neuropathological, and genetic variables predicted cognitive impairment in our PART cohort (Table 2).  
306 We found that age and cerebrovascular disease were the strongest predictors of cognitive impairment ( $p$   
307  $< 0.0001$  for both cases). ARTAG and hippocampal atrophy were also significant predictors, but to a  
308 lesser extent ( $p < 0.05$  for both cases). There were more reported men and subjects with a history of  
309 psychiatric illness, argyrophilic grains, incidental Lewy body pathology, infarcts, and microinfarcts in the  
310 cognitively impaired PART group, however none of these predictors was significantly different ( $p > 0.05$   
311 for all conditions). *APOE*  $\epsilon 4$  (at least 1  $\epsilon 4$  allele) was reported more in the cognitively normal PART group  
312 but did not reach significance. Braak NFT stage significantly predicted cognitive impairment ( $p < 0.05$ ).

313 Additionally, the computer-assisted morphometrics in the entorhinal region, hippocampus proper, and  
314 the combined region were significantly associated with cognitive impairment ( $p = 0.0001$ , Figure 3A-C,  
315 Table 3). Lastly, when the Braak NFT stage was correlated with computer-assisted morphometrics in the  
316 combined region ( $p < 0.001$ ), there was a high degree of variability between the Braak NFT stage and  
317 the computer-assisted combined region morphometrics (Figure 3D).

318 Finally, using a multivariable model, we assessed whether any measurements for p-tau predicted  
319 cognitive impairment when controlling for age. In this adjusted analysis, we found that computer-assisted  
320 morphometrics used to capture p-tau burden in the hippocampus proper and combined region were  
321 significantly associated with cognitive impairment in PART ( $p < 0.05$  for both cases). However, the  
322 computer-assisted morphometrics in the entorhinal region were not associated with cognitive impairment  
323 yet there was a trend toward statistical significance ( $p = 0.068$ ). The Braak NFT stage was not able to  
324 predict cognitive impairment when controlling for age ( $p = 0.73$ , Table 3, Figure 4).

325 **Discussion**

326 Since the neuropathological criteria for PART were proposed, the terminology has been widely adopted,  
327 but controversy persists, especially around its relationship to Alzheimer disease (AD). Delineating the  
328 histological/cellular features that are associated with cognitive impairment in PART is critical for  
329 advancing our understanding of the pathology and determining the extent to which it overlaps with AD.  
330 The fact that subjects with PART, as with AD neuropathologic change, can range in their cognitive status  
331 from normal to demented, raises the question as to whether cognitive reserve/resilience plays a role or  
332 alternatively whether we are not adequately capturing the relevant features, such as common  
333 comorbidities or other factors. This study, by using a large autopsy cohort with multivariate analyses,  
334 directly addresses these critical questions. The goal was to leverage our collection of post-mortem PART  
335 brains to characterize the clinical, pathological, and genetic features that are associated with cognitive  
336 impairment in PART. Additionally, we sought to compare Braak stage with pathology burden measures  
337 derived from p-tau immunohistochemistry that quantifies severity independently of neuroanatomical  
338 vulnerability. To overcome intra-center variability in tau pathology measures, we reassessed each case  
339 histologically to maximize accuracy.

340 We found that all of our PART definite cases had p-tau restricted mainly to the MTL (Braak NFT  
341 stage <IV), which is consistent with and supports other previous studies investigating PART [4, 17, 34].  
342 Cases ranged in cognitive impairment with the majority of subjects being cognitively normal, and  
343 consistent with prior data, the PART subjects tended to be older than individuals with AD [17, 59]. The  
344 results of our study confirm those of previous autopsy studies showing that cerebrovascular disease  
345 predicts cognitive impairment in PART [6, 49]. Interestingly, we did not see a strong correlation between  
346 cognitive impairment and microinfarcts, while others have shown a correlation with cognition in the oldest  
347 old [14]. We did however, find novel, unreported associations of increased age, hippocampal atrophy,  
348 and ARTAG with cognitive impairment in our PART definite cohort. Similar to what has been reported  
349 by those utilizing the NACC database, our results verify those with a higher Braak NFT stage are  
350 associated with more rapid cognitive decline [33].

351 While these associations have yet to be reported in PART, there are numerous studies showing  
352 that age, atrophy, and ARTAG may be associated with cognitive impairment [9, 23, 32, 50, 53].  
353 Surprisingly, we did not see increased odds of the Braak NFT stage being associated with cognitive  
354 impairment when controlling for age as has been reported in other studies [6]. However, we did find that  
355 using computer-assisted morphometrics to assess p-tau burden in the entorhinal region, hippocampus,  
356 and combined region was able to significantly predict cognitive impairment, similar to other studies [1,  
357 13]. While Braak NFT staging is the most widely employed approach for assessing p-tau, it is limited in  
358 that it primarily focuses on regionality and not disease burden [25]. Other studies have employed both  
359 manual and computer assisted quantitative approaches that may capture aspects of pathological features  
360 with more power [24, 26, 56]. However, a majority of these approaches focuses on AD which may not be  
361 relevant in the context of PART, where p-tau pathology does not progress in the same hierarchical  
362 manner proposed by Braak in AD [10, 16]. Hence this study highlights several new methodologies to  
363 assess p-tau burden, which our results suggest to be a more accurate predictor of clinical symptomology  
364 in those with PART.

365 In addition to assessing p-tau burden, we also examined the effect of *APOE* status in PART as a  
366 predictor for cognitive impairment. *APOE*  $\epsilon$ 4 has been strongly suggested as an important predictor of  
367 cognitive decline in AD while *APOE*  $\epsilon$ 2 has been shown to be protective [15, 18, 54, 58]. However, many  
368 of these studies have been performed in AD cohorts, and in aging cohorts there has been evidence  
369 suggesting the  $\epsilon$ 4 allele is not a risk factor for cognitive impairment [57]. Our data agree with that reported  
370 by Small *et al.* as we did not see an association with *APOE*  $\epsilon$ 4 and cognitive impairment, which might be  
371 explained by the fact that we studied a pathologically confirmed amyloid-negative cohort. Recent work  
372 has suggested that *APOE* may exacerbate tau pathology independently of amyloid deposition [55]. Here,  
373 we failed to detect an association of cognitive impairment in PART with the *MAPT* H1 haplotype; future  
374 larger studies with more statistical power are required to delineate the genetic architecture of PART.

375 This study had notable limitations. There was a relatively small number of subjects in the  
376 cognitively impaired PART group ( $n=50$ ), which may weaken our power to predict cognitive impairment.

377 Additionally, because a majority of our subjects were not from longitudinally studied prospective cohorts,  
378 we were unable to obtain certain lifestyle variables, such as actual years of education and concussion  
379 history, which could potentially significantly affect our model. However, given that diagnosing PART pre-  
380 mortem is currently challenging, it would be impractical to create such a prospective cohort. We would  
381 also like to highlight the association we observed with ARTAG and cognitive status might be only due to  
382 collinearity between p-tau severity and ARTAG, with p-tau probably the driving pathology and the ARTAG  
383 association being significant because of its potential dependence on p-tau. Lastly, our study was limited  
384 to pathology of the medial temporal lobe and frontal cortex. A more exhaustive study would have  
385 incorporated a greater number of brain regions to more extensively address other potential tau-related  
386 pathologies.

387 In summary, our findings are consistent with the hypothesis that PART is an amyloid-independent  
388 tauopathy, primarily affecting the medial temporal lobe, which can present with cognitive impairment.  
389 Several demographic and neuropathological variables including age, ARTAG, cerebrovascular disease,  
390 hippocampal atrophy, Braak NFT stage, and p-tau computer assessments were significantly associated  
391 with cognitive impairment in our PART cohort. The Braak NFT stage was not a significant predictor of  
392 cognitive impairment when controlling for age, while the computer-assistant morphometrics were. These  
393 data strongly suggest that neuroanatomical staging used in AD may not be as relevant to PART given  
394 the pathology minimally spreads beyond the medial temporal lobe. Novel techniques to measure p-tau  
395 burden can further our understanding of PART pathology and associated clinical and genetic features.



396

**Table 1. Patient data**

|                                      | Overall           | Cognitive Status  |                   | <i>p</i>          |
|--------------------------------------|-------------------|-------------------|-------------------|-------------------|
|                                      |                   | Normal            | Impaired*         |                   |
| <i>Demographics</i>                  |                   |                   |                   |                   |
| Average age at testing (range)       | 83.2 (52.9-105.1) | 81.0 (52.9-102.4) | 88.3 (69.8-105.1) | <b>&lt;0.0001</b> |
| Total (Male / Female)                | 174 (82 / 92)     | 124 (63 / 61)     | 50 (19 / 31)      | 0.126***          |
| Age at last visit (%)                |                   |                   |                   |                   |
| <60                                  | 7 (4.0)           | 7 (5.6)           | 0 (0.0)           |                   |
| 60-69                                | 15 (8.6)          | 14 (11.3)         | 1 (1.7)           |                   |
| 70-79                                | 33 (19.0)         | 30 (24.2)         | 3 (5.2)           |                   |
| 80-89                                | 76 (43.7)         | 45 (36.3)         | 31 (53.4)         |                   |
| 90+                                  | 51 (29.3)         | 28 (22.6)         | 23 (39.7)         |                   |
| Education, at least some college (%) | 32 (18.4)         | 15 (78.9)         | 17 (77.3)         | 0.89              |
| History of psychiatric illness (%)   | 45 (25.9)         | 29 (31.9)         | 17 (45.9)         | 0.13              |
| <i>Neuropathological data</i>        |                   |                   |                   |                   |
| Argyrophilic grains                  | 32 (18.4)         | 12 (9.7)          | 10 (20.0)         | 0.06              |
| Lewy body pathology (incidental)     | 16 (9.2)          | 11 (8.9)          | 5 (10.0)          | 0.82              |
| Cerebrovascular disease**            | 27 (15.5)         | 6 (4.8)           | 21 (42.0)         | <b>&lt;0.0001</b> |
| Infarcts (vascular brain injury)     | 37 (21.3)         | 24 (19.4)         | 13 (26.0)         | 0.33              |
| Hippocampus ARTAG positive (%)       | 43 (24.7)         | 25 (21.6)         | 18 (38.3)         | <b>0.03</b>       |
| <i>Genetic Data</i>                  |                   |                   |                   |                   |
| Presence of ≥1 APOE ε4 allele        | 22 (12.6)         | 16 (12.9)         | 6 (11.3)          | 0.77              |
| Presence of ≥1 APOE ε2 allele        | 46 (26.4)         | 27 (21.8)         | 19 (35.8)         | 0.06              |
| Presence of ≥1 MAPT H2               | 59 (33.9)         | 42 (36.2)         | 17 (36.2)         | 1                 |

\* Mild cognitive impairment or dementia, \*\* excluding cerebral amyloid angiopathy, \*\*\*Male sex, significant values in bold (Chi squared test)

397

398

**Table 2. Unadjusted odds of being cognitively impaired**

|                                                                     | <b>OR</b> | <b>95% CI</b> | <b>p value</b>    |
|---------------------------------------------------------------------|-----------|---------------|-------------------|
| <i>Characteristic</i>                                               |           |               |                   |
| Age, at testing                                                     | 1.08      | 1.04-1.13     | <b>&lt;0.0001</b> |
| Education, y                                                        | 0.87      | 0.67-1.12     | 0.28              |
| Sex                                                                 | 1.69      | 0.86-3.30     | 0.13              |
| APOE (at least 1 ε4 allele)                                         | 0.988     | 0.36-2.70     | 0.98              |
| History of psychiatric diagnosis                                    | 1.82      | 0.83-3.98     | 0.14              |
| Aging-related tau astrogliopathy (ARTAG)                            | 2.26      | 1.08-4.72     | <b>0.03</b>       |
| Argyrophilic grains                                                 | 2.33      | 0.94-5.82     | 0.07              |
| Lewy body pathology (incidental)                                    | 1.14      | 0.38-3.47     | 0.82              |
| Cerebrovascular disease*                                            | 14.24     | 5.27-38.48    | <b>&lt;0.0001</b> |
| Infarcts (vascular brain injury)                                    | 1.46      | 0.68-3.17     | 0.33              |
| Microinfarcts                                                       | 1.05      | 0.43-2.59     | 0.91              |
| Hippocampal atrophy                                                 | 5.32      | 1.04-27.09    | <b>0.04</b>       |
| Braak NFT stage                                                     | 1.37      | 1.03-1.83     | <b>0.03</b>       |
| <i>Computer-assisted p-tau (AT8) burden (positive pixel counts)</i> |           |               |                   |
| Entorhinal region                                                   | 1.90      | 1.31-2.75     | <b>0.001</b>      |
| Hippocampus proper                                                  | 2.17      | 1.48-3.20     | <b>&lt;0.0001</b> |
| Entorhinal region & Hippocampus proper                              | 2.12      | 1.44-3.11     | <b>&lt;0.0001</b> |

\* Excluding cerebral amyloid angiopathy, significant values in bold (logistic regression)

401

**Table 3. Odds of being cognitively impaired at death, adjusted**

|                                                          | <b>OR</b> | <b>95% CI</b> | <b>p value</b> |
|----------------------------------------------------------|-----------|---------------|----------------|
| Braak NFT stage                                          | 1.01      | 0.72-1.41     | 0.98           |
| P-tau burden (computer-assisted AT8 IHC positive pixels) |           |               |                |
| Entorhinal region                                        | 1.46      | 0.97-2.20     | 0.07           |
| Hippocampus                                              | 1.66      | 1.07-2.57     | <b>0.02</b>    |
| Entorhinal region & hippocampus                          | 1.62      | 1.06-2.49     | <b>0.03</b>    |
| Significant values in bold (logistic regression)         |           |               |                |

402

403

404

Figure 1

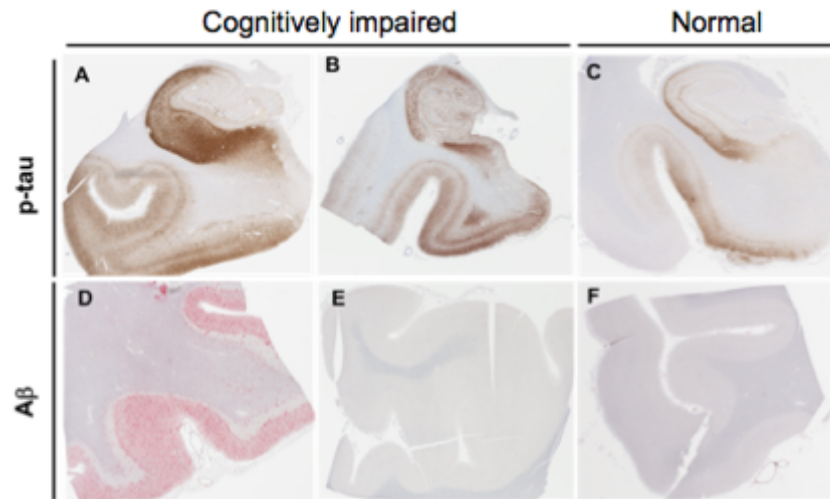

405

406 **Figure 1. Comparison of amyloid and tau pathology in primary age-related tauopathy**  
407 **(PART) versus Alzheimer disease (AD). (A) Immunohistochemical staining using antisera**  
408 **to hyperphosphorylated tau in an AD brain shows marked hyperphosphorylated tau (p-tau)-**  
409 **containing neurofibrillary tangles (NFT) in the hippocampus which extends past the collateral**  
410 **sulcus into the parahippocampal gyrus and other neocortical regions. (B, C) Subjects with mild**  
411 **to severe PART have elevated p-tau levels in the hippocampus predominantly restricted to the**  
412 **medial temporal lobe. (D, E, F) Subjects with AD neuropathologic change have abundant Aβ-**  
413 **containing plaques in neocortical structures, whereas those with PART have sparse or none.**  
414 **These neuropathologic changes in AD and PART are seen in association with varying degree**  
415 **of cognitive impairment ranging from cognitively normal to demented.**

416

417

418

419

420

Figure 2

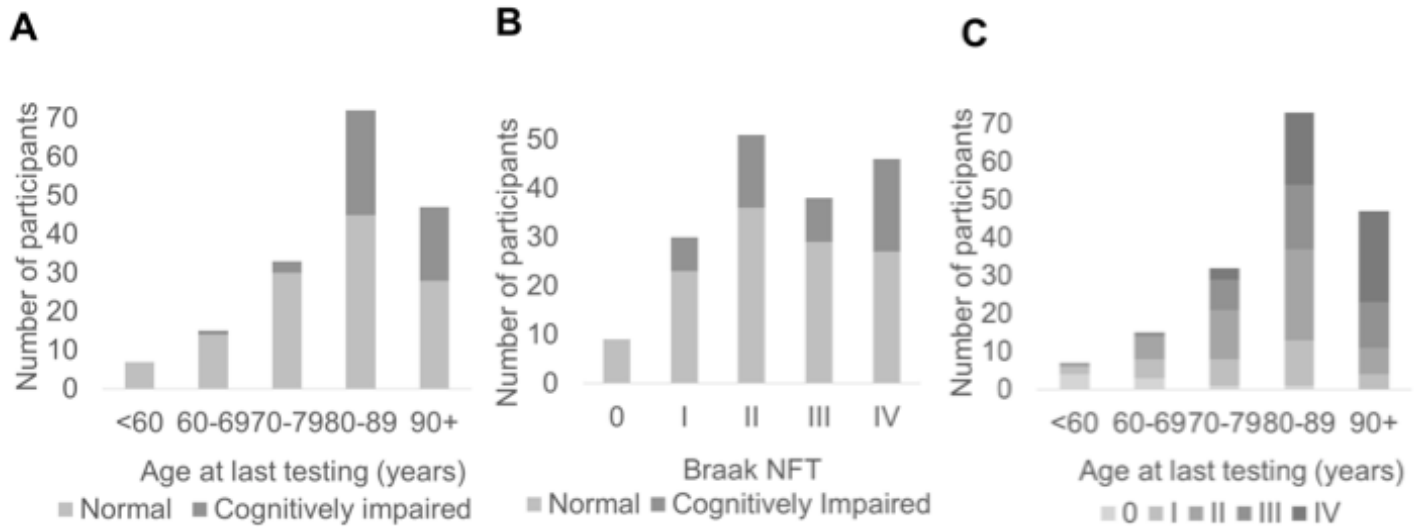

421

422 **Figure 2. Distribution of age, Braak neurofibrillary tangle (NFT) stage and cognitive**

423 **status. (A)** The number of normal and cognitively impaired subjects across the age spectrum.

424 **(B)** The number of cognitively normal and impaired subjects by Braak stage. **(C)** The number

425 of subjects across the aging spectrum by Braak stage.

426

Figure 3

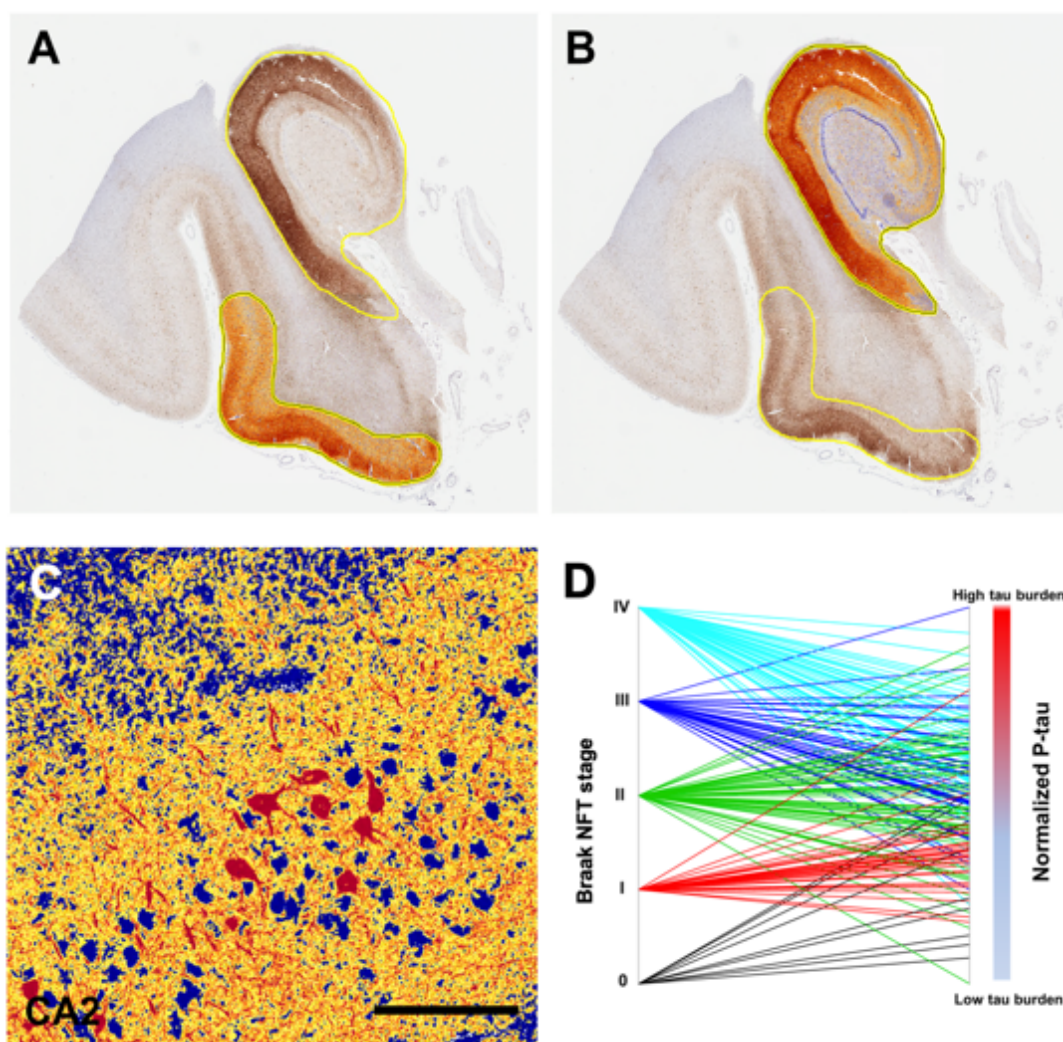

427

428 **Figure 3. Computer-assisted morphometrics to assess pathological tau burden. (A, B)**

429 Quantitative assessment of hyperphosphorylated tau (p-tau) burden was performed on whole

430 slide images of the hippocampus stained for p-tau (AT8) using immunohistochemistry. Positive

431 pixel counts were determined in two regions (hippocampus proper and entorhinal region).

432 Results were normalized to the total area assessed. A third summary score of the total p-tau

433 burden of the medial temporal lobe was calculated by summing positive pixels in both. (C) High

434 power image shows high intensity in red, medium intensity in yellow and negative staining in

435 blue. (D) Parallel plot showing the relationship between Braak stage and the computer

436 morphometric quantification of p-tau using the normalized medial temporal lobe (hippocampus  
437 and entorhinal region). Scale bar = 150  $\mu\text{m}$ .

438

Figure 4

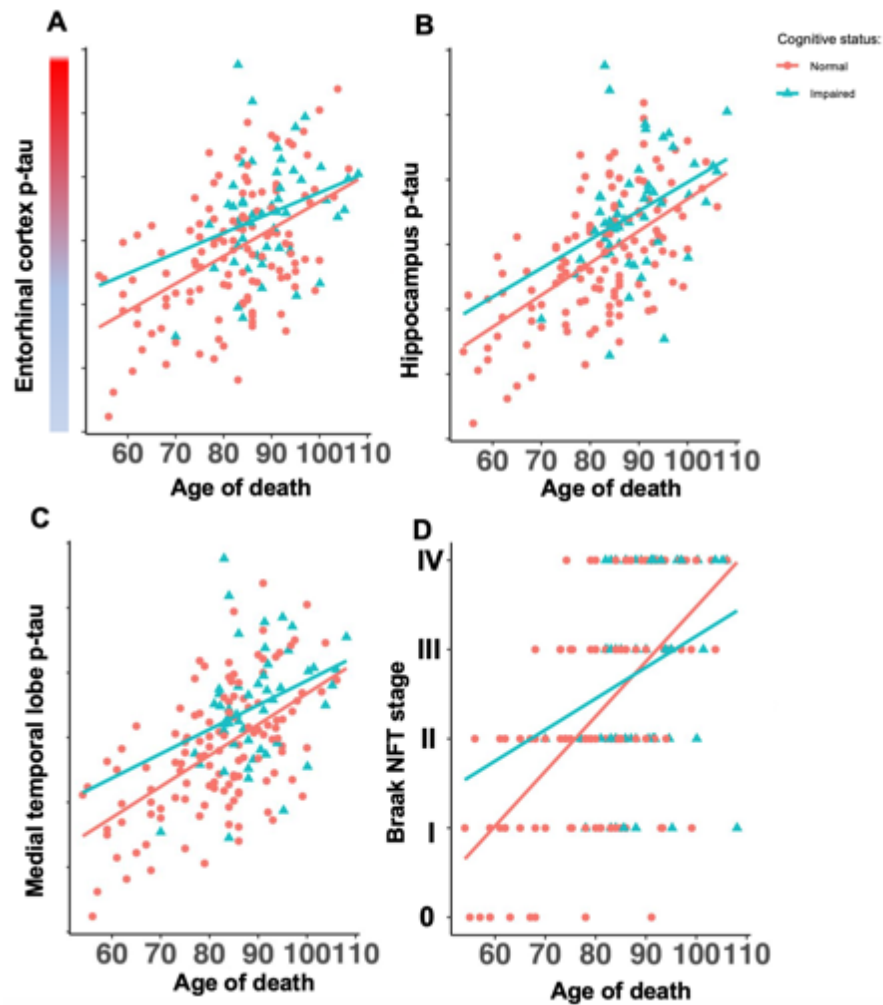

439

440 **Figure 4. Pathological tau burden in normal and cognitively impaired subjects across the**  
441 **aging spectrum. (A-C)** Generalized linear models of age versus tau burden show significant  
442 differences between cognitively normal and cognitively impaired subjects in the hippocampus  
443 proper ( $p = 0.047$ ), and combined entorhinal region and hippocampus regions ( $p < 0.048$ ), but  
444 not in the entorhinal region alone ( $p = 0.07$ ). **(D)** Generalized linear model of age vs Braak NFT  
445 staging did not show significant differences between cognitively normal and cognitively impaired  
446 subjects ( $p = 0.73$ ).



447 **References**

- 448 1 Abner EL, Neltner JH, Jicha GA, Patel E, Anderson SL, Wilcock DM, Van Eldik LJ, Nelson  
449 PT (2018) Diffuse Amyloid-beta Plaques, Neurofibrillary Tangles, and the Impact of APOE  
450 in Elderly Persons' Brains Lacking Neuritic Amyloid Plaques. *J Alzheimers Dis* 64: 1307-  
451 1324 Doi 10.3233/JAD-180514
- 452 2 Alafuzoff I, Arzberger T, Al-Sarraj S, Bodi I, Bogdanovic N, Braak H, Bugiani O, Del-  
453 Tredici K, Ferrer I, Gelpi E et al (2008) Staging of neurofibrillary pathology in Alzheimer's  
454 disease: a study of the BrainNet Europe Consortium. *Brain pathology* 18: 484-496 Doi  
455 10.1111/j.1750-3639.2008.00147.x
- 456 3 Attems J, Neltner JH, Nelson PT (2014) Quantitative neuropathological assessment to  
457 investigate cerebral multi-morbidity. *Alzheimers Res Ther* 6: Doi ARTN 85  
458 10.1186/s13195-014-0085-y
- 459 4 Bell WR, An Y, Kageyama Y, English C, Rudow GL, Pletnikova O, Thambisetty M, O'Brien  
460 R, Moghekar AR, Albert M et al (2019) Neuropathologic, genetic, and longitudinal  
461 cognitive profiles in primary age-related tauopathy (PART) and Alzheimer's disease.  
462 *Alzheimers Dement* 15: 8-16 Doi 10.1016/j.jalz.2018.07.215
- 463 5 Bennett DA, Buchman AS, Boyle PA, Barnes LL, Wilson RS, Schneider JA (2018)  
464 Religious Orders Study and Rush Memory and Aging Project. *Adv Alzh Dis* 6: 159-187  
465 Doi 10.3233/978-1-61499-876-1-159
- 466 6 Besser LM, Crary JF, Mock C, Kukull WA (2017) Comparison of symptomatic and  
467 asymptomatic persons with primary age-related tauopathy. *Neurology* 89: 1707-1715 Doi  
468 10.1212/WNL.0000000000004521
- 469 7 Besser LM, Mock C, Teylan MA, Hassenstab J, Kukull WA, Crary JF (2019) Differences  
470 in Cognitive Impairment in Primary Age-Related Tauopathy Versus Alzheimer Disease. *J*  
471 *Neuropathol Exp Neurol*: Doi 10.1093/jnen/nly132
- 472 8 Besser LM, Mock C, Teylan MA, Hassenstab J, Kukull WA, Crary JF (2019) Differences  
473 in Cognitive Impairment in Primary Age-Related Tauopathy Versus Alzheimer Disease. *J*  
474 *Neuropathol Exp Neurol* 78: 219-228 Doi 10.1093/jnen/nly132
- 475 9 Bishop NA, Lu T, Yankner BA (2010) Neural mechanisms of ageing and cognitive decline.  
476 *Nature* 464: 529-535 Doi 10.1038/nature08983

- 477 10 Braak H, Braak E (1991) Neuropathological staging of Alzheimer-related changes. *Acta*  
478 *neuropathologica* 82: 239-259 Doi 10.1007/bf00308809
- 479 11 Braak H, Del Tredici K (2014) Are cases with tau pathology occurring in the absence of  
480 Abeta deposits part of the AD-related pathological process? *Acta neuropathologica* 128:  
481 767-772 Doi 10.1007/s00401-014-1356-1
- 482 12 Caillet-Boudin ML, Buee L, Sergeant N, Lefebvre B (2015) Regulation of human MAPT  
483 gene expression. *Molecular neurodegeneration* 10: 28 Doi 10.1186/s13024-015-0025-8
- 484 13 Cherry JD, Tripodis Y, Alvarez VE, Huber B, Kiernan PT, Daneshvar DH, Mez J,  
485 Montenegro PH, Solomon TM, Alosco MLet al (2016) Microglial neuroinflammation  
486 contributes to tau accumulation in chronic traumatic encephalopathy. *Acta Neuropathol*  
487 *Com* 4: Doi UNSP 112 10.1186/s40478-016-0382-8
- 488 14 Corrada MM, Sonnen JA, Kim RC, Kawas CH (2016) Microinfarcts are common and  
489 strongly related to dementia in the oldest-old: The 90+ study. *Alzheimers Dement* 12:  
490 900-908 Doi 10.1016/j.jalz.2016.04.006
- 491 15 Cosentino S, Scarmeas N, Helzner E, Glymour MM, Brandt J, Albert M, Blacker D, Stern  
492 Y (2008) APOE epsilon 4 allele predicts faster cognitive decline in mild Alzheimer  
493 disease. *Neurology* 70: 1842-1849 Doi 10.1212/01.wnl.0000304038.37421.cc
- 494 16 Crary JF (2016) Primary age-related tauopathy and the amyloid cascade hypothesis: the  
495 exception that proves the rule? *J Neurol Neuromedicine* 1: 53-57
- 496 17 Crary JF, Trojanowski JQ, Schneider JA, Abisambra JF, Abner EL, Alafuzoff I, Arnold SE,  
497 Attems J, Beach TG, Bigio EH et al (2014) Primary age-related tauopathy (PART): a  
498 common pathology associated with human aging. *Acta neuropathologica* 128: 755-766  
499 Doi 10.1007/s00401-014-1349-0
- 500 18 Dik MG, Jonker C, Comijs HC, Bouter LM, Twisk JW, van Kamp GJ, Deeg DJ (2001)  
501 Memory complaints and APOE-epsilon4 accelerate cognitive decline in cognitively  
502 normal elderly. *Neurology* 57: 2217-2222 Doi 10.1212/wnl.57.12.2217
- 503 19 Duyckaerts C, Braak H, Brion JP, Buee L, Del Tredici K, Goedert M, Halliday G, Neumann  
504 M, Spillantini MG, Tolnay Met al (2015) PART is part of Alzheimer disease. *Acta*  
505 *neuropathologica* 129: 749-756 Doi 10.1007/s00401-015-1390-7

- 506 20 Farfel JM, Yu L, De Jager PL, Schneider JA, Bennett DA (2016) Association of APOE  
507 with tau-tangle pathology with and without beta-amyloid. *Neurobiology of Aging* 37: 19-  
508 25 Doi [10.1016/j.neurobiolaging.2015.09.011](https://doi.org/10.1016/j.neurobiolaging.2015.09.011)
- 509 21 Farrell K, Cosentino S, Iida MA, Chapman S, Bennett DA, Faust PL, Louis ED, Crary JF  
510 (2019) Quantitative Assessment of Pathological Tau Burden in Essential Tremor: A  
511 Postmortem Study. *J Neuropath Exp Neur* 78: 31-37 Doi [10.1093/jnen/nly104](https://doi.org/10.1093/jnen/nly104)
- 512 22 Folstein MF, Robins LN, Helzer JE (1983) The Mini-Mental State Examination. *Arch Gen*  
513 *Psychiatry* 40: 812 Doi [10.1001/archpsyc.1983.01790060110016](https://doi.org/10.1001/archpsyc.1983.01790060110016)
- 514 23 Fox NC, Scahill RI, Crum WR, Rossor MN (1999) Correlation between rates of brain  
515 atrophy and cognitive decline in AD. *Neurology* 52: 1687-1689 Doi [10.1212/Wnl.52.8.1687](https://doi.org/10.1212/Wnl.52.8.1687)
- 517 24 Giannakopoulos P, Herrmann FR, Bussiere T, Bouras C, Kovari E, Perl DP, Morrison JH,  
518 Gold G, Hof PR (2003) Tangle and neuron numbers, but not amyloid load, predict  
519 cognitive status in Alzheimer's disease. *Neurology* 60: 1495-1500 Doi  
520 [10.1212/01.wnl.0000063311.58879.01](https://doi.org/10.1212/01.wnl.0000063311.58879.01)
- 521 25 Gold G, Bouras C, Kovari E, Canuto A, Glaria BG, Malky A, Hof PR, Michel JP,  
522 Giannakopoulos P (2000) Clinical validity of Braak neuropathological staging in the  
523 oldest-old. *Acta neuropathologica* 99: 579-582; discussion 583-574 Doi  
524 [10.1007/s004010051163](https://doi.org/10.1007/s004010051163)
- 525 26 Gomez-Isla T, Hollister R, West H, Mui S, Growdon JH, Petersen RC, Parisi JE, Hyman  
526 BT (1997) Neuronal loss correlates with but exceeds neurofibrillary tangles in Alzheimer's  
527 disease. *Ann Neurol* 41: 17-24 Doi [10.1002/ana.410410106](https://doi.org/10.1002/ana.410410106)
- 528 27 Hamasaki H, Honda H, Okamoto T, Koyama S, Suzuki SO, Ohara T, Ninomiya T,  
529 Kiyohara Y, Iwaki T (2017) Recent Increases in Hippocampal Tau Pathology in the Aging  
530 Japanese Population: The Hisayama Study. *J Alzheimers Dis* 55: 613-624 Doi  
531 [10.3233/Jad-160521](https://doi.org/10.3233/Jad-160521)
- 532 28 Hauw JJ, Daniel SE, Dickson D, Horoupian DS, Jellinger K, Lantos PL, McKee A, Tabaton  
533 M, Litvan I (1994) Preliminary NINDS neuropathologic criteria for Steele-Richardson-  
534 Olszewski syndrome (progressive supranuclear palsy). *Neurology* 44: 2015-2019 Doi  
535 [10.1212/wnl.44.11.2015](https://doi.org/10.1212/wnl.44.11.2015)

- 536 29 Hickman RA, Flowers XE, Wisniewski T (2020) Primary Age-Related Tauopathy (PART):  
537 Addressing the Spectrum of Neuronal Tauopathic Changes in the Aging Brain. *Curr*  
538 *Neurol Neurosci Rep* 20: 39 Doi 10.1007/s11910-020-01063-1
- 539 30 Hyman BT (1998) New neuropathological criteria for Alzheimer disease. *Arch Neurol* 55:  
540 1174-1176 Doi 10.1001/archneur.55.9.1174
- 541 31 Jack CR, Jr., Bennett DA, Blennow K, Carrillo MC, Dunn B, Haeberlein SB, Holtzman  
542 DM, Jagust W, Jessen F, Karlawish J et al (2018) NIA-AA Research Framework: Toward  
543 a biological definition of Alzheimer's disease. *Alzheimers Dement* 14: 535-562 Doi  
544 10.1016/j.jalz.2018.02.018
- 545 32 Jack CR, Petersen RC, Xu Y, O'Brien PC, Smith GE, Ivnik RJ, Boeve BF, Tangalos EG,  
546 Kokmen E (2000) Rates of hippocampal atrophy correlate with change in clinical status  
547 in aging and AD. *Neurology* 55: 484-489 Doi 10.1212/Wnl.55.4.484
- 548 33 Jefferson-George KS, Wolk DA, Lee EB, McMillan CT (2017) Cognitive decline  
549 associated with pathological burden in primary age-related tauopathy. *Alzheimers*  
550 *Dement* 13: 1048-1053 Doi 10.1016/j.jalz.2017.01.028
- 551 34 Jellinger KA, Alafuzoff I, Attems J, Beach TG, Cairns NJ, Crary JF, Dickson DW, Hof PR,  
552 Hyman BT, Jack CR, Jr. et al (2015) PART, a distinct tauopathy, different from classical  
553 sporadic Alzheimer disease. *Acta neuropathologica* 129: 757-762 Doi 10.1007/s00401-  
554 015-1407-2
- 555 35 Jellinger KA, Attems J (2007) Neurofibrillary tangle-predominant dementia: comparison  
556 with classical Alzheimer disease. *Acta neuropathologica* 113: 107-117 Doi  
557 10.1007/s00401-006-0156-7
- 558 36 Josephs KA, Murray ME, Tosakulwong N, Whitwell JL, Knopman DS, Machulda MM,  
559 Weigand SD, Boeve BF, Kantarci K, Petrucelli L et al (2017) Tau aggregation influences  
560 cognition and hippocampal atrophy in the absence of beta-amyloid: a clinico-imaging-  
561 pathological study of primary age-related tauopathy (PART). *Acta neuropathologica* 133:  
562 705-715 Doi 10.1007/s00401-017-1681-2
- 563 37 Kovacs GG (2015) Invited review: Neuropathology of tauopathies: principles and practice.  
564 *Neuropathology and applied neurobiology* 41: 3-23 Doi 10.1111/nan.12208
- 565 38 Kovacs GG, Ferrer I, Grinberg LT, Alafuzoff I, Attems J, Budka H, Cairns NJ, Crary JF,  
566 Duyckaerts C, Ghetti B et al (2016) Aging-related tau astroglialopathy (ARTAG):

- 567 harmonized evaluation strategy. *Acta neuropathologica* 131: 87-102 Doi  
568 10.1007/s00401-015-1509-x
- 569 39 Kvitting AS, Fallman K, Wressle E, Marcusson J (2019) Age-Normative MMSE Data for  
570 Older Persons Aged 85 to 93 in a Longitudinal Swedish Cohort. *J Am Geriatr Soc* 67:  
571 534-538 Doi 10.1111/jgs.15694
- 572 40 Markesbery WR (1997) Neuropathological criteria for the diagnosis of Alzheimer's  
573 disease. *Neurobiol Aging* 18: S13-19 Doi 10.1016/s0197-4580(97)00064-x
- 574 41 McKee AC, Cairns NJ, Dickson DW, Folkerth RD, Keene CD, Litvan I, Perl DP, Stein TD,  
575 Vonsattel JP, Stewart Wet al (2016) The first NINDS/NIBIB consensus meeting to define  
576 neuropathological criteria for the diagnosis of chronic traumatic encephalopathy. *Acta*  
577 *neuropathologica* 131: 75-86 Doi 10.1007/s00401-015-1515-z
- 578 42 McKee AC, Stein TD, Crary JF, Bieniek KF, Cantu RC, Kovacs GG (2020) Practical  
579 Considerations in the Diagnosis of Mild Chronic Traumatic Encephalopathy and  
580 Distinction From Age-Related Tau Astroglipathy. *J Neuropathol Exp Neurol* 79: 921-924  
581 Doi 10.1093/jnen/nlaa047
- 582 43 McKee AC, Stein TD, Nowinski CJ, Stern RA, Daneshvar DH, Alvarez VE, Lee HS, Hall  
583 G, Wojtowicz SM, Baugh CMet al (2013) The spectrum of disease in chronic traumatic  
584 encephalopathy. *Brain* 136: 43-64 Doi 10.1093/brain/aws307
- 585 44 Mirra SS, Heyman A, McKeel D, Sumi SM, Crain BJ, Brownlee LM, Vogel FS, Hughes  
586 JP, van Belle G, Berg L (1991) The Consortium to Establish a Registry for Alzheimer's  
587 Disease (CERAD). Part II. Standardization of the neuropathologic assessment of  
588 Alzheimer's disease. *Neurology* 41: 479-486 Doi 10.1212/wnl.41.4.479
- 589 45 Mock C, Teylan M, Beecham G, Besser L, Cairns NJ, Crary JF, Katsumata Y, Nelson PT,  
590 Kukull W (2020) The Utility of the National Alzheimer's Coordinating Center's Database  
591 for the Rapid Assessment of Evolving Neuropathologic Conditions. *Alzheimer Dis Assoc*  
592 *Disord* 34: 105-111 Doi 10.1097/WAD.0000000000000380
- 593 46 Montine TJ, Phelps CH, Beach TG, Bigio EH, Cairns NJ, Dickson DW, Duyckaerts C,  
594 Frosch MP, Masliah E, Mirra SSet al (2012) National Institute on Aging-Alzheimer's  
595 Association guidelines for the neuropathologic assessment of Alzheimer's disease: a  
596 practical approach. *Acta neuropathologica* 123: 1-11 Doi 10.1007/s00401-011-0910-3

- 597 47 Morris JC (1993) The Clinical Dementia Rating (CDR): current version and scoring rules.  
598 Neurology 43: 2412-2414 Doi 10.1212/wnl.43.11.2412-a
- 599 48 Morris M, Maeda S, Vessel K, Mucke L (2011) The many faces of tau. Neuron 70: 410-  
600 426 Doi 10.1016/j.neuron.2011.04.009
- 601 49 Pierce AL, Kawas CH (2017) Dementia in the oldest old: Beyond Alzheimer disease.  
602 PLoS Med 14: e1002263 Doi 10.1371/journal.pmed.1002263
- 603 50 Planche V, Coupe P, Helmer C, Le Goff M, Amieva H, Tison F, Dartigues JF, Catheline  
604 G (2019) Evolution of brain atrophy subtypes during aging predicts long-term cognitive  
605 decline and future Alzheimer's clinical syndrome. Neurobiology of Aging 79: 22-29 Doi  
606 10.1016/j.neurobiolaging.2019.03.006
- 607 51 Quintas-Neves M, Teylan MA, Besser L, Soares-Fernandes J, Mock CN, Kukull WA,  
608 Crary JF, Oliveira TG (2019) Magnetic resonance imaging brain atrophy assessment in  
609 primary age-related tauopathy (PART). Acta Neuropathol Commun 7: 204 Doi  
610 10.1186/s40478-019-0842-z
- 611 52 Robinson AC, Davidson YS, Roncaroli F, Minshull J, Tinkler P, Horan MA, Payton A,  
612 Pendleton N, Mann DMA (2021) Early changes in visuospatial episodic memory can help  
613 distinguish primary age-related tauopathy from Alzheimer's disease. Neuropathology and  
614 applied neurobiology: Doi 10.1111/nan.12726
- 615 53 Robinson JL, Corrada MM, Kovacs GG, Dominique M, Caswell C, Xie SX, Lee VMY,  
616 Kawas CH, Trojanowski JQ (2018) Non-Alzheimer's contributions to dementia and  
617 cognitive resilience in The 90+Study. Acta neuropathologica 136: 377-388 Doi  
618 10.1007/s00401-018-1872-5
- 619 54 Serrano-Pozo A, Qian J, Monsell SE, Betensky RA, Hyman BT (2015) APOE epsilon 2 is  
620 associated with milder clinical and pathological Alzheimer disease. Annals of Neurology  
621 77: 917-929 Doi 10.1002/ana.24369
- 622 55 Shi Y, Yamada K, Liddel SA, Smith ST, Zhao L, Luo W, Tsai RM, Spina S, Grinberg  
623 LT, Rojas JC et al (2017) ApoE4 markedly exacerbates tau-mediated neurodegeneration  
624 in a mouse model of tauopathy. Nature 549: 523-527 Doi 10.1038/nature24016
- 625 56 Signaevsky M, Prastawa M, Farrell K, Tabish N, Baldwin E, Han N, Iida MA, Koll J, Bryce  
626 C, Purohit Det al (2019) Artificial intelligence in neuropathology: deep learning-based  
627 assessment of tauopathy. Lab Invest 99: 1019-1029 Doi 10.1038/s41374-019-0202-4

- 628 57 Small BJ, Graves AB, McEvoy CL, Crawford FC, Mullan M, Mortimer JA (2000) Is APOE-  
629 epsilon 4 a risk factor for cognitive impairment in normal aging? *Neurology* 54: 2082-2088  
630 Doi 10.1212/Wnl.54.11.2082
- 631 58 Small BJ, Rosnick CB, Fratiglioni L, Backman L (2004) Apolipoprotein E and cognitive  
632 performance: a meta-analysis. *Psychol Aging* 19: 592-600 Doi 10.1037/0882-  
633 7974.19.4.592
- 634 59 Teylan M, Besser LM, Crary JF, Mock C, Gauthreaux K, Thomas NM, Chen YC, Kukull  
635 WA (2019) Clinical diagnoses among individuals with primary age-related tauopathy  
636 versus Alzheimer's neuropathology. *Lab Invest* 99: 1049-1055 Doi 10.1038/s41374-019-  
637 0186-0
- 638 60 Teylan M, Mock C, Gauthreaux K, Chen YC, Chan KCG, Hassenstab J, Besser LM,  
639 Kukull WA, Crary JF (2020) Cognitive trajectory in mild cognitive impairment due to  
640 primary age-related tauopathy. *Brain* 143: 611-621 Doi 10.1093/brain/awz403
- 641 61 Walker JM, Richardson TE, Farrell K, Iida MA, Foong C, Shang P, Attems J, Ayalon G,  
642 Beach TG, Bigio EH et al (2021) Early Selective Vulnerability of the CA2 Hippocampal  
643 Subfield in Primary Age-Related Tauopathy. *J Neuropathol Exp Neurol* 80: 102-111 Doi  
644 10.1093/jnen/nlaa153
- 645 62 West MJ, Slomianka L, Gundersen HJ (1991) Unbiased stereological estimation of the  
646 total number of neurons in the subdivisions of the rat hippocampus using the optical  
647 fractionator. *Anat Rec* 231: 482-497 Doi 10.1002/ar.1092310411
- 648 63 Zhukareva V, Trojanowski JQ, Lee VM (2004) Assessment of pathological tau proteins in  
649 frontotemporal dementias: qualitative and quantitative approaches. *Am J Geriatr  
650 Psychiatry* 12: 136-145
- 651 64 Zhukareva V, Trojanowski JQ, Lee VM (2004) Assessment of pathological tau proteins  
652 in frontotemporal dementias - Qualitative and quantitative approaches. *Am J Geriatr  
653 Psychiat* 12: 136-145 Doi DOI 10.1176/appi.ajgp.12.2.136  
654
